# Supplementary material
Source: publisher site journal article supplement (https://www.spandidos-publications.com/3594/downloadSupplementary)

Figure S1. Increased expression of HOXC11 and HOTAIR in multiple types of cancer. Increased expression of HOTAIR in (A) COAD, (B) ESCA, (C) BRCA and (D) KIRC. Increased expression of HOXC11 in (E) COAD, (F) ESCA, (G) BRCA and (H) KIRC. \*\*\* $P < 0.001$ . HOTAIR, homeobox transcript antisense intergenic RNA; HOXC11, homeobox C11; COAD, colon adenocarcinoma; ESCA, esophageal carcinoma; BRCA, invasive breast carcinoma; KIRC, kidney renal clear cell carcinoma.

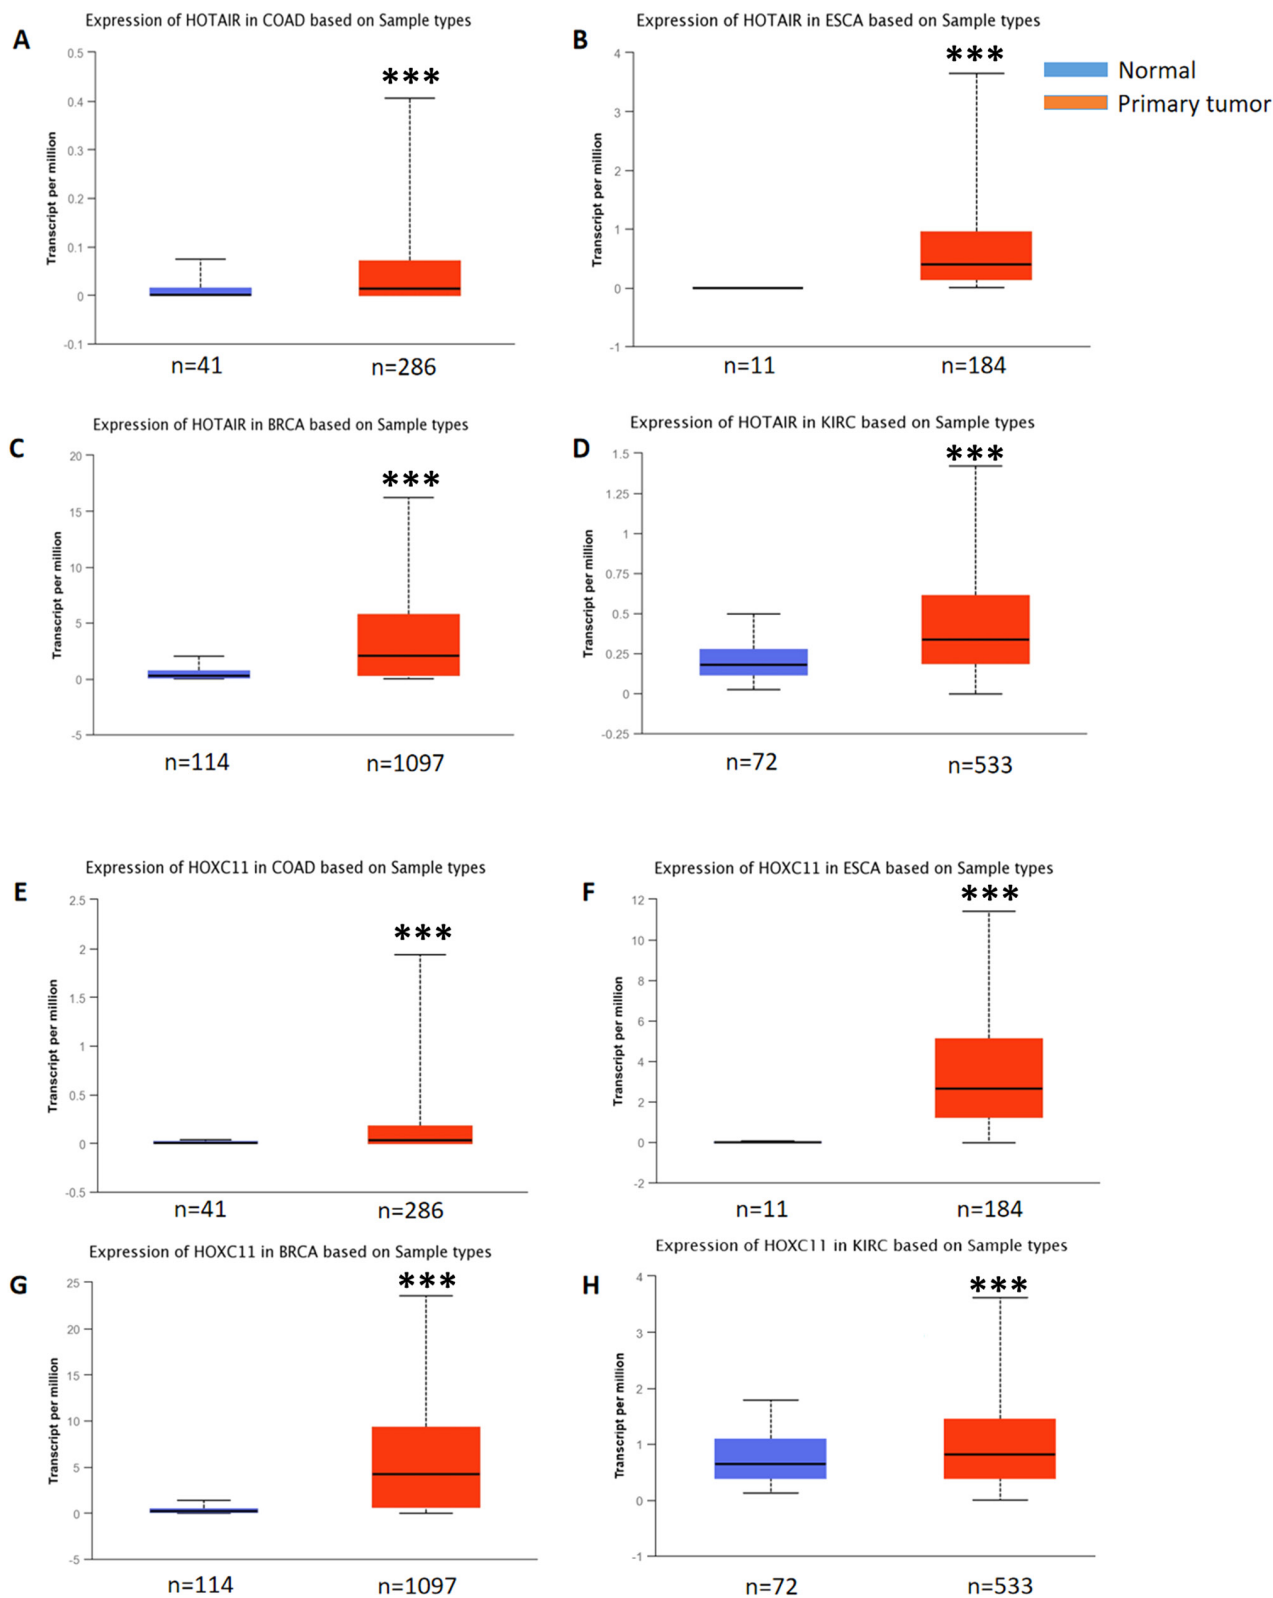

Figure S2. Co-expression of HOTAIR and HOXC11 in (A) colon adenocarcinoma, (B) esophageal carcinoma, (C) breast invasive carcinoma and (D) kidney renal clear cell carcinoma. HOTAIR, homeobox transcript antisense intergenic RNA; HOXC11, homeobox C11; N, non-tumor; T, tumor.

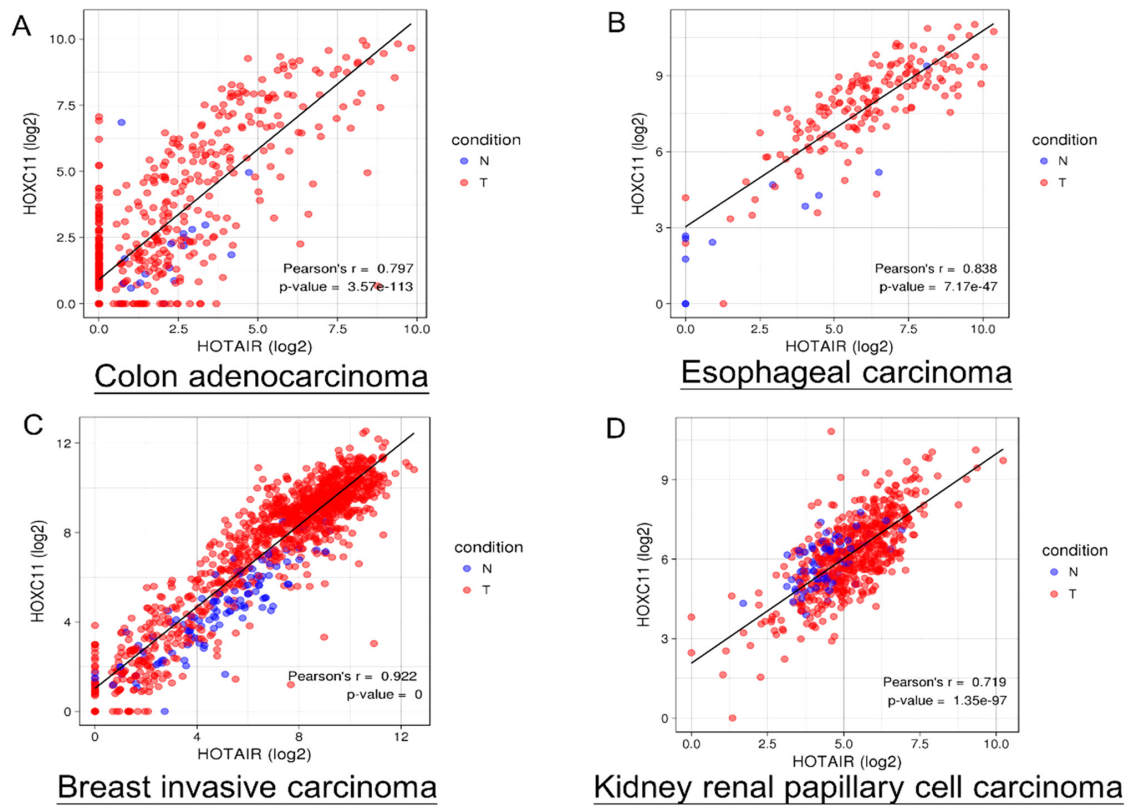

Figure S3. Association between the expression of HOXC11 and HOTAIR and prognosis. (A-D) Induced expression of HOXC11 was related to poor prognosis in COAD and KIRC. (E-H) Induced expression of HOTAIR was related to poor prognosis in COAD and KIRC. HOTAIR, homeobox transcript antisense intergenic RNA; HOXC11, homeobox C11; COAD, colon adenocarcinoma; ESCA, esophageal carcinoma; BRCA, invasive breast carcinoma; KIRC, kidney renal clear cell carcinoma.

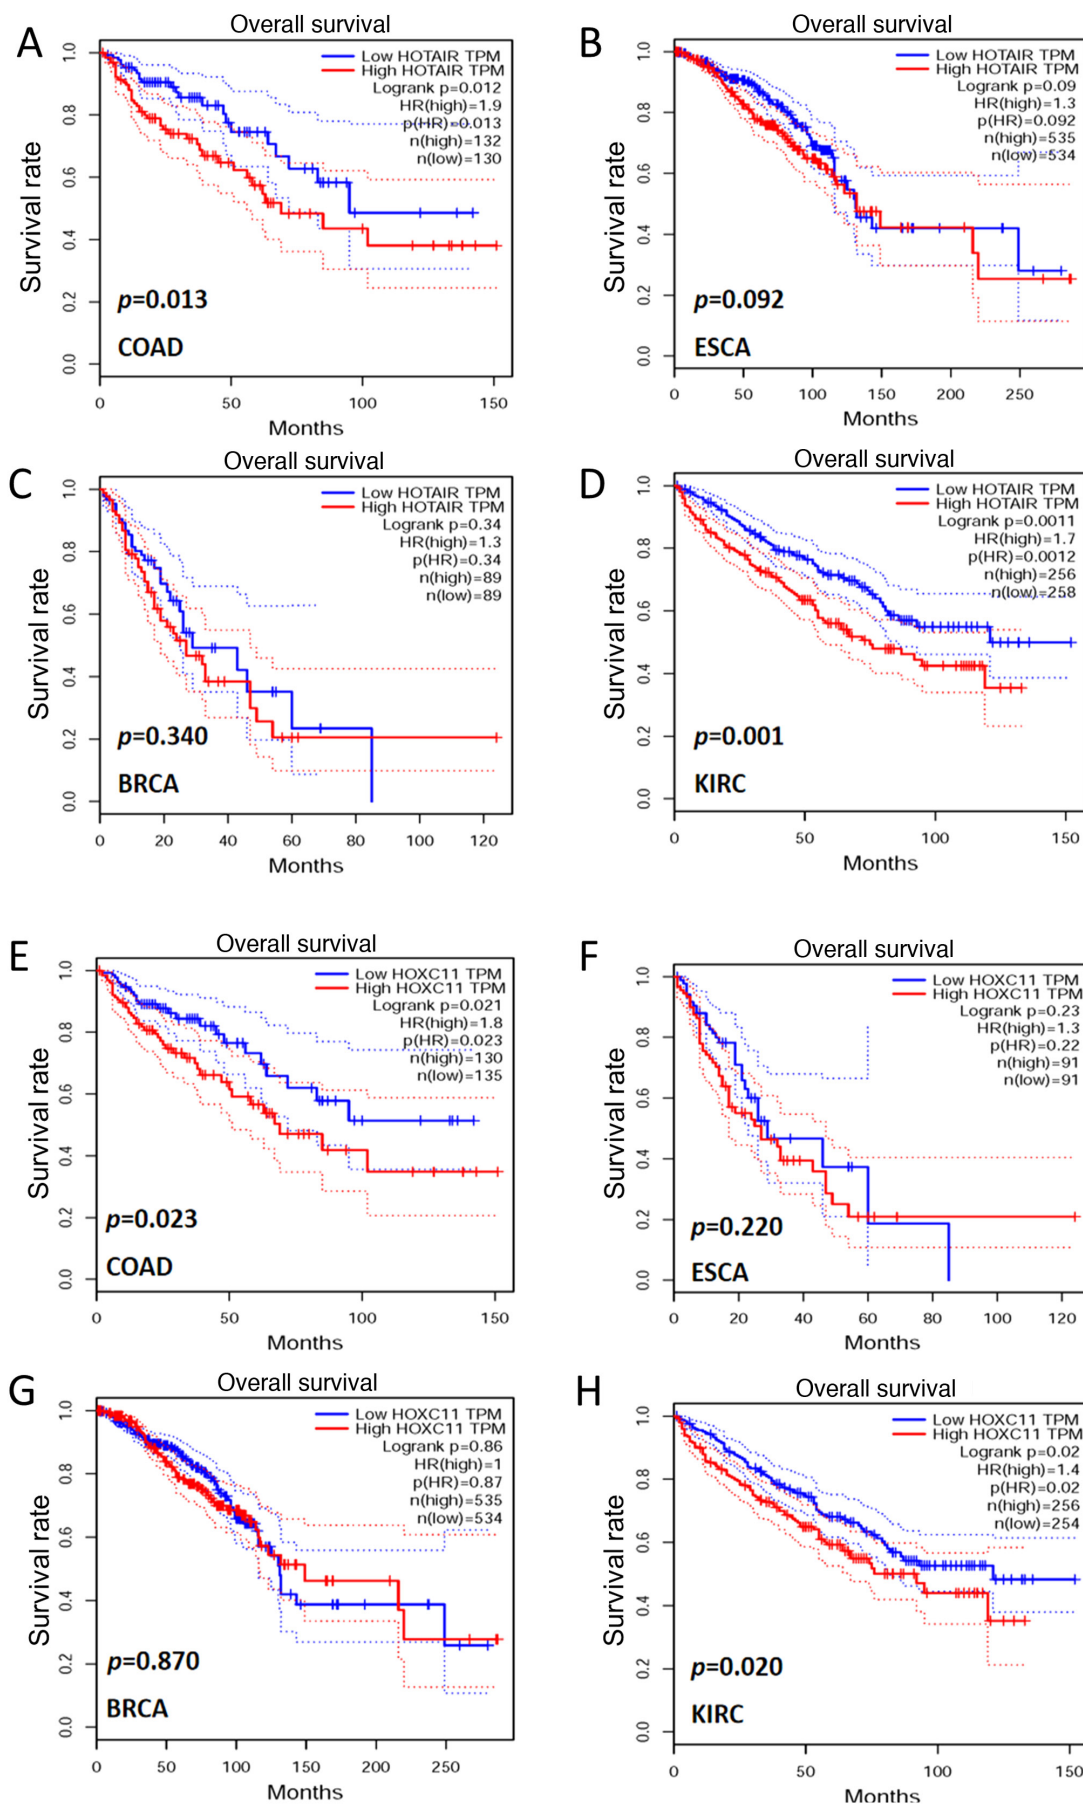

Supplement: Supplementary file 1 [file downloadSupplementary]
